# Supplementary material for: Intrinsic functional connectivity predicts remission on antidepressants: a randomized controlled trial to identify clinically applicable imaging biomarkers
Source: PubMed Central journal article supplement (PMC5838245; doi:10.1038/s41398-018-0100-3), 2018-03-06
Supplement: 41398_2018_100_MOESM1_ESM.pdf [file 41398_2018_100_MOESM1_ESM.pdf]

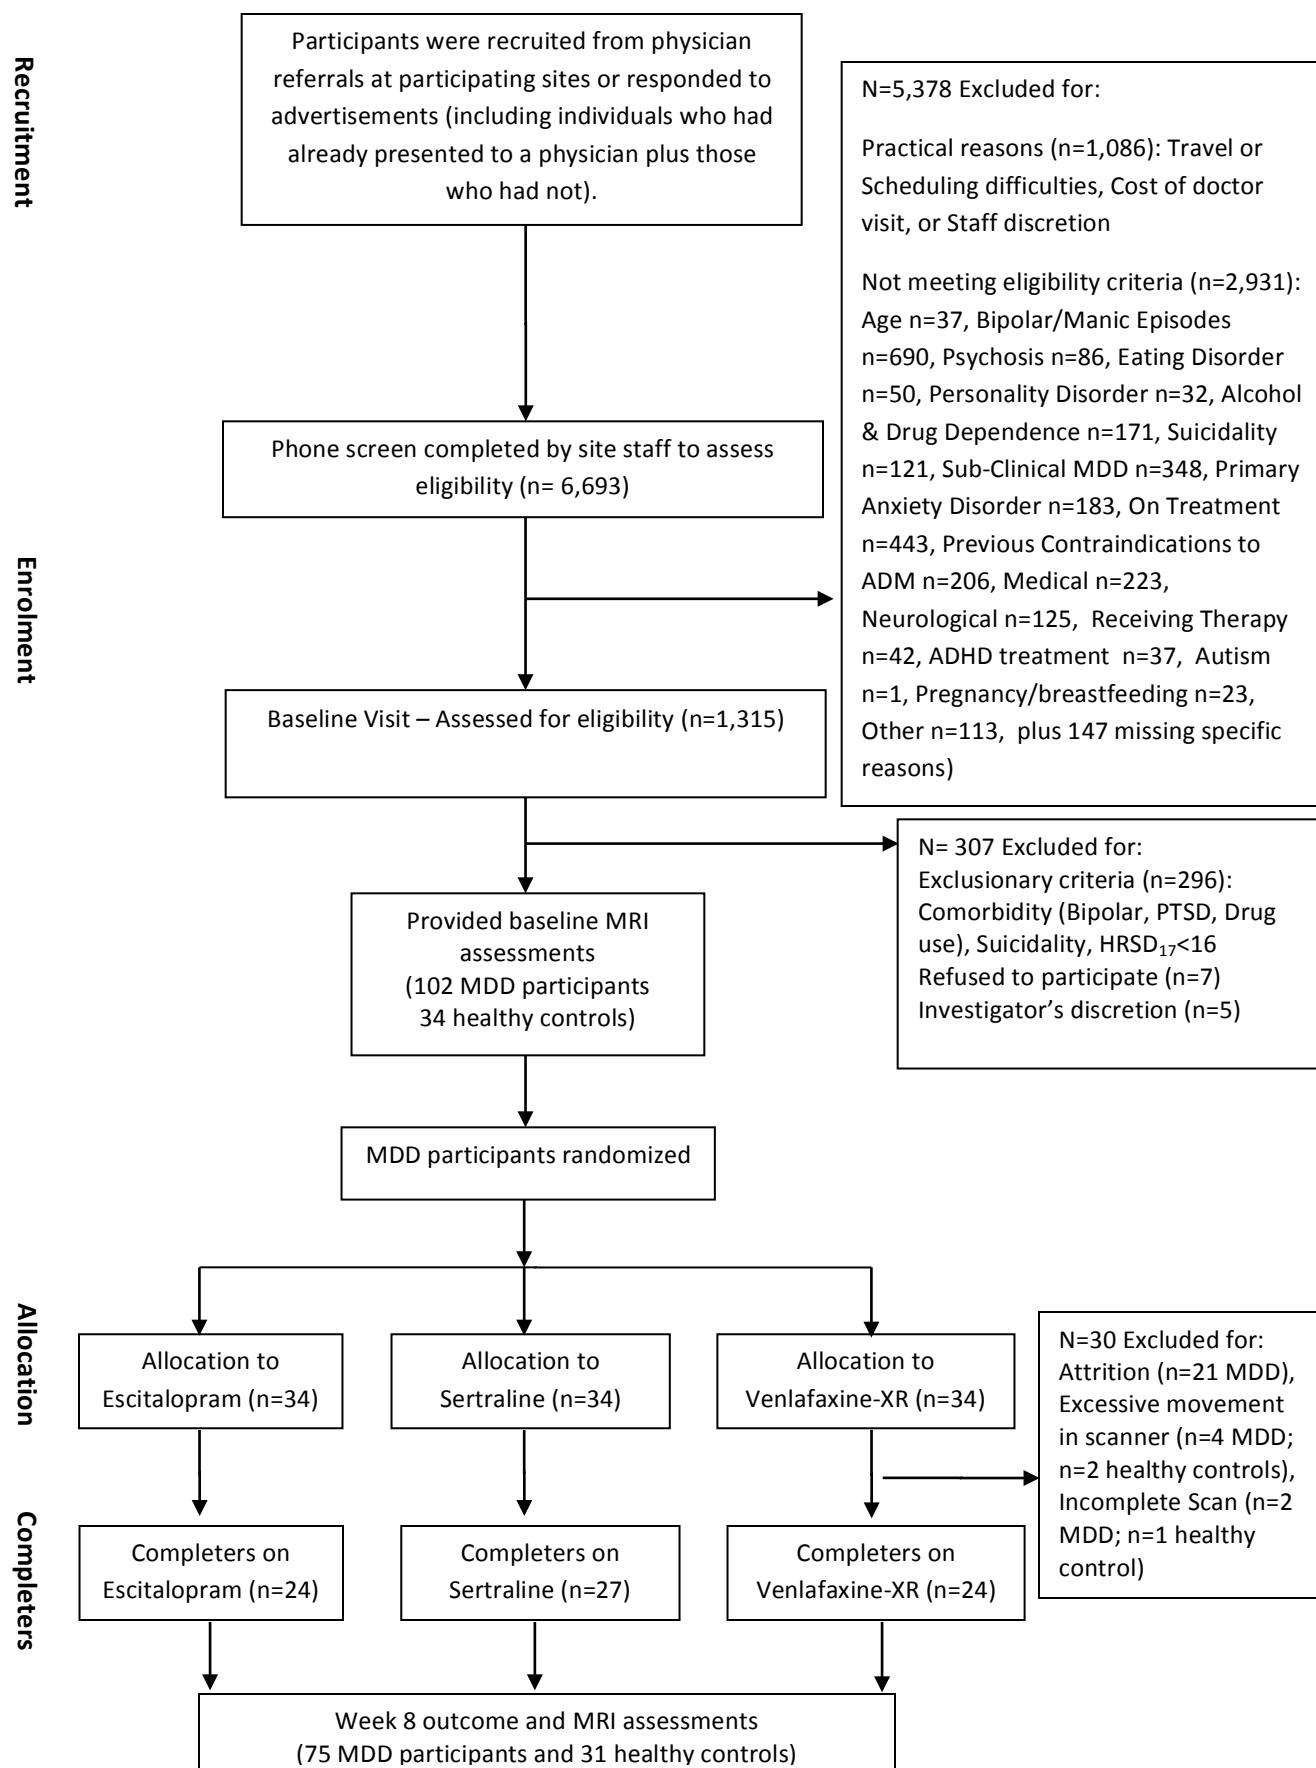

Abbreviations: ADHD: Attention Deficit Hyperactivity Disorder, ADM: antidepressant medication, HRSD<sub>17</sub>, 17-item Hamilton Rating Scale for Depression; MDD: Major Depressive Disorder; MRI: Magnetic Resonance Imaging; PTSD, Post-Traumatic Stress Disorder
