# Supplementary material for: Intrinsic functional connectivity predicts remission on antidepressants: a randomized controlled trial to identify clinically applicable imaging biomarkers
Source: PubMed Central journal article supplement (PMC5838245; doi:10.1038/s41398-018-0100-3), 2018-03-06

**A.** Regions in which Remitters > Non-Remitters in connectivity

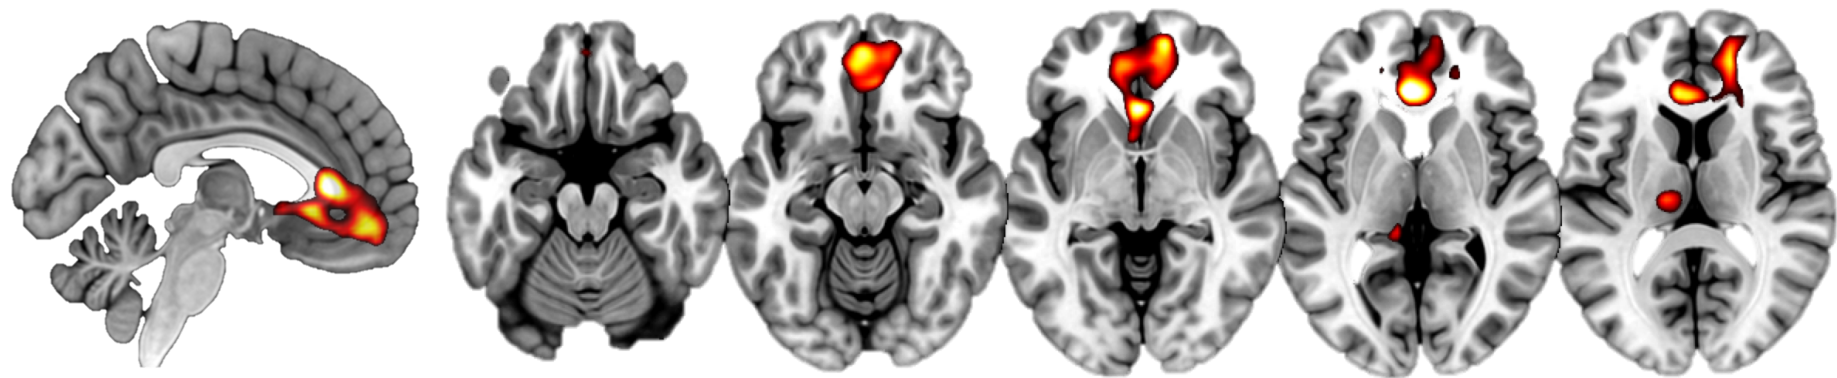

**B.** Regions that showed a linear association with HRSD<sub>17</sub> Percent Reduction from Baseline

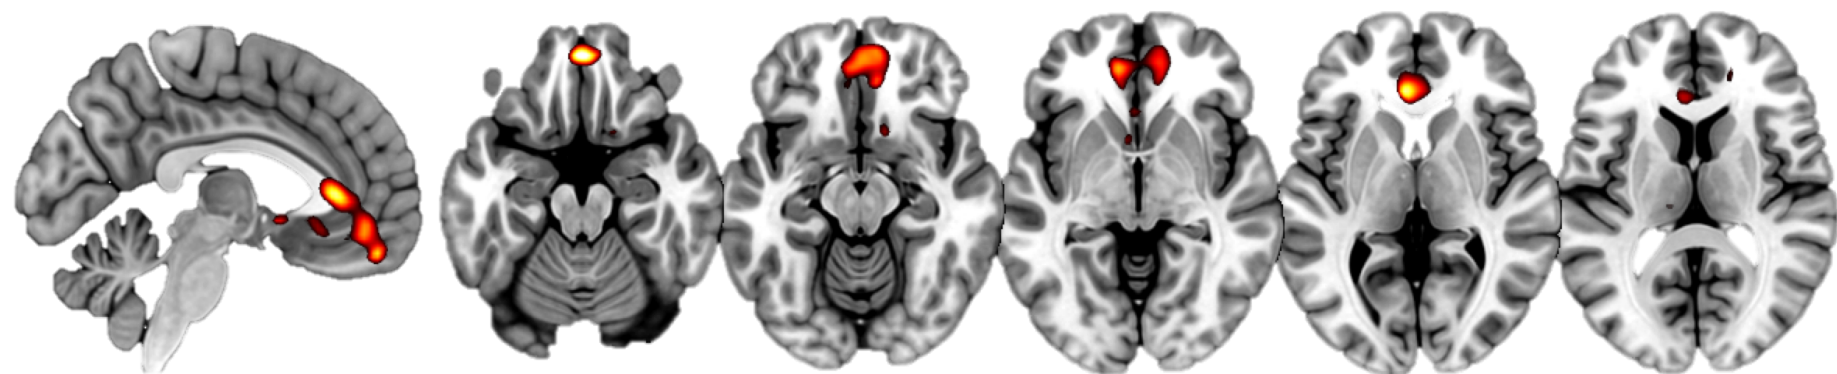

**C.** Overlap between binary and linear associations with treatment outcome

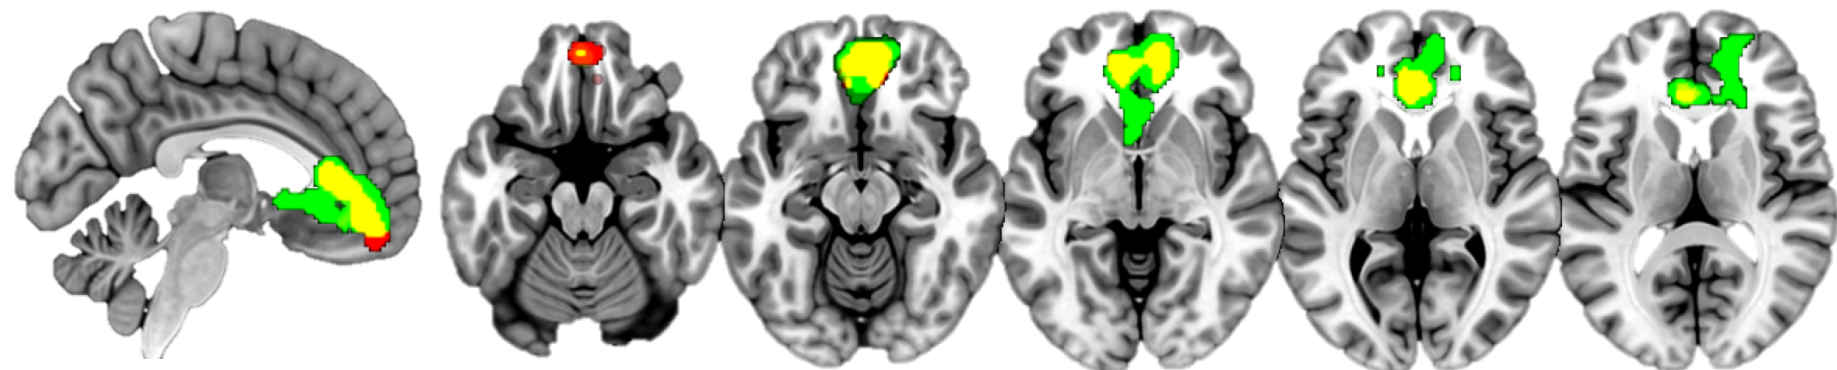

Supplement: 41398_2018_100_MOESM2_ESM.pdf [file 41398_2018_100_MOESM2_ESM.pdf]
